1 Space, time, and captivity: quantifying the factors influencing the fecal microbiome of an alpine  
2 ungulate

3 Sarah E. Haworth<sup>1,2\*</sup>

4 Kevin S. White<sup>3</sup>

5 Steeve D. Côté<sup>4</sup>

6 Aaron B.A. Shafer<sup>1,2</sup>

7 1. Forensics Program, Trent University, K9J 7B8 Peterborough, Canada

8 2. Environmental and Life Sciences Graduate Program, Trent University, 7K9J 7B8  
9 Peterborough, Canada

10 3. Division of Wildlife Conservation, Alaska Department of Fish and Game, Juneau, AK,  
11 USA

12 4. Département de Biologie and Centre for Northern Studies, Université Laval, Québec,  
13 Québec G1V 0A6, Canada

14 \*sarahhaworth@trentu.ca

15

## 16 **Abstract**

17           The community of microorganisms in the gut is affected by host species, diet, and  
18 environment and is linked to normal functioning of the host organism. Although the microbiome  
19 fluctuates in response to host demands and environmental changes, there are core groups of  
20 microorganisms that remain relatively constant throughout the hosts lifetime. Ruminants are  
21 mammals that rely on highly specialized digestive and metabolic modifications, including  
22 microbiome adaptations, to persist in extreme environments. Here, we assayed the fecal  
23 microbiome of four mountain goat (*Oreamnos americanus*) populations in western North  
24 America. We quantified fecal microbiome diversity and composition among groups in the wild  
25 and captivity, across populations, and in a single group over time. There were no differences in  
26 community evenness or diversity across groups, although we observed a decreasing diversity  
27 trend across summer months. Pairwise sample estimates grouped the captive population  
28 distinctly from the wild populations, and moderately grouped the southern wild group distinctly  
29 from the two northern wild populations. We identified 33 genera modified by captivity, with  
30 major differences in key groups associated with cellulose degradation that likely reflect  
31 differences in diet. Our findings are consistent with other ruminant studies and provide baseline  
32 microbiome data in this enigmatic species, offering valuable insights into the health of wild  
33 alpine ungulates.

34 **Keywords:** *Oreamnos americanus*, microbiome, ruminant, microorganisms, rumen, goat

35 **Summary:** This study characterizes the microbiome of mountain goat (*Oreamnos americanus*)  
36 populations across populations and over summer months; we also quantified the effects of  
37 captivity to offer more insights into the health of alpine wildlife.

## 38 **Introduction**

39           The microbiome describes a dynamic community of microorganisms that colonize  
40 organisms from birth onwards. Microorganisms in the gut play a key role in host physiological  
41 and immunological development (Berg, 1996), with fecal matter containing microbiome DNA  
42 that is shed during the digestion and egestion processes (Ingala et al., 2018; Vandeputte et al.,  
43 2016). The microbiome can vary according to the host species, age, diet, health, reproductive

44 status, and external environment, but is directly linked to host health, including metabolism,  
45 immunity, and development (Nishida & Ochman, 2017). The fecal microbiome is reflective of a  
46 transient response to changes in the host, such as responses to dietary shifts across seasons, but  
47 core groups of microorganisms are found in stable relative abundances throughout the life of the  
48 host and the relative proportions of these groups can act like a signature of the host's health and  
49 environment, with reductions in diversity associated closely with reductions in fitness (Amato et  
50 al., 2018; Clayton et al., 2018; Donaldson et al., 2015). The stable relative abundances of the  
51 core groups are directly related to the function and the demand of the core groups. The relative  
52 ratio of *Firmicutes* to *Bacteroidetes*, for one example, the two most commonly dominant core  
53 groups in mammal fecal microbiomes, can be used to discern between carnivorous and  
54 herbivorous mammals since each group is responsible for different metabolic demands  
55 (Huntington et al., 2019; Kreisinger et al., 2018; Muegge et al., 2011).

56 Measuring signatures in the fecal microbiome over time, between populations, such as  
57 between captive and wild populations of mammals, can help effectively monitor animal health  
58 (Bahrndorff et al., 2016; Bik et al., 2016). For example, many captive populations of mammal  
59 species suffer from poor health and some conditions have been correlated to fecal microbiome  
60 dysbiosis and decreased diversity microbial groups responsible for normal health (Clayton et al.,  
61 2018; Li et al., 2018; McKenzie et al., 2017). Actions that target the correction of the  
62 microbiome, meaning promoting signatures of core groups that are closer to what is seen in  
63 relevant wild and healthy populations, have been suggested as a feasible approach to help  
64 alleviate and manage health issues (Li et al., 2018). Moreover, evidence is mounting that  
65 supports the link between host phenotypic and genomic variation, and the microbiome (Carthey  
66 et al., 2018; Sharpton, 2018); this interaction is particularly relevant when it comes to rapidly  
67 changing environments. For example, the host microbial community of coral was critical in  
68 facilitating adaptation to warming temperatures (Webster et al., 2017; Ziegler et al. 2017).

69 Ruminants are herbivorous hooved mammals (ungulates) with specialized anatomical and  
70 physiological adaptations to accommodate the cellulolytic fermentation of low-nutrition, high-  
71 fiber plant materials (Noel et al., 2017; de Tarso et al., 2016). Numerous extant ruminant  
72 populations have been domesticated (e.g. cow, goat), while many of the remaining wild ruminant  
73 species are facing population declines that are directly and indirectly driven by human activity,

74 including agricultural-related activities that have promoted predation, disease and parasitism  
75 expansions, environmental change, and have led to significant habitat loss (Smith et al., 2016; Di  
76 Marco et al., 2014; Martin, 2001). Non-invasive monitoring of the fecal microbiome of ruminant  
77 populations serves as a potential tool that can be used to inform management and conservation  
78 decisions aimed at improving the health of captive animals, promoting adaptation to  
79 environmental change, and preventing disease and parasitic outbreaks (McKenzie et al. 2017;  
80 Amato et al., 2013).

81         The North American mountain goat (*Oreamnos americanus*) is a sub-alpine ruminant and  
82 a symbolic icon of mountain wilderness. Mountain goats are found in fragmented, and  
83 occasionally isolated, sub-populations across the Western Cordillera mountain ranges (Shafer et  
84 al., 2012; Festa-Bianchet, 2008). Mountain goats show mixed seasonal and sexual habitat  
85 selection preferences with relatively small home ranges and limited inter- and intra- population  
86 movement, which possibly lends to low genetic variability (Shafer et al., 2012; Ortego et al.,  
87 2011; Poole & Heard, 2003). Their longer lifespans, upwards of 12 years, along with seasonally  
88 and sexually dependent habitat selection, makes mountain goats a unique study system for  
89 attempting to understand how variation in the microbiome supports their highly adapted and  
90 unique alpine lifestyle. Furthermore, the longevity of mountain goats, relative to many model  
91 and non-model systems, creates opportunities for researchers to conduct prolonged surveillance  
92 and infer individual trends over time (e.g. season, year), including non-invasive fecal  
93 microbiome studies.

94         Here we assayed the fecal microbiome of four western North American mountain goat  
95 populations, of which one was a captive population (Figure 1). We tested two hypotheses: i)  
96 captivity reduces microbial diversity in mammals (McKenzie et al., 2017; Sun et al., 2016; Kohl  
97 et al., 2014; Carey et al., 2013); and ii) diversity is negatively correlated to latitude (Dikongué et  
98 al., 2017). We further took advantage of temporal sampling in one population to assay changes  
99 over three summer months, where we hypothesized a shift in fecal microbiome diversity  
100 reflecting the decreased abundance of food resources over the summertime as resources are  
101 consumed and depleted (Hicks et al., 2018; Hu et al., 2018; Noel et al., 2017; Festa-Bianchet &  
102 Côté, 2008; Hamel & Côté, 2007). Collectively, we predicted that the effect of captivity would  
103 drive the strongest differences in the diversity and the composition in mountain goat fecal

104 microbiomes, followed by seasonality and biogeography. This is the first study to establish a  
105 fecal microbiome profile for both captive and wild mountain goat populations and contributes  
106 valuable baseline knowledge on the diversity of microbiomes for different species (*sensu* McKenzie  
107 et al. 2017), while quantifying the influence of three important drivers of diversity and composition:  
108 space, time and, captivity.

## 109 **Methods**

### 110 **Study species**

111 Mountain goats are part of the Bovidae family and inhabit the mountains of western  
112 North America. Mountain goats are an important game species and populations are managed for  
113 harvest and non-consumptive uses. Mountain goats can be described as generalist foragers  
114 relative to other ruminant species, but it has been shown that they do show preferential selection  
115 of forage under some circumstances (Côté and Festa-Bianchet, 2003). During their daily  
116 movements, mountain goats spread an abundant amount of compact, dry pellets (feces) multiple  
117 times per day; such pellets are well preserved in the alpine environment they occupy.

### 118 **Study sites**

119 The Calgary Zoo, Alberta, Canada (CZ; 51°N, 114°W) is one of Canada's oldest  
120 accredited zoos. The zoo houses a small group of captive mountain goats that are fed year-round  
121 an *ad libitum* diet of herbivore pellets and mixed hay (see Table S1 for detailed diet  
122 information). This group of mountain goats is accessible for research and veterinary purposes.  
123 Caw Ridge, Alberta (CR; 54N, 119W) is an alpine and sub-alpine habitat in western Canada with  
124 a regional population of wild mountain goats that have been extensively monitored since 1989  
125 (Ortego et al., 2011; Mainguy, Côté, & Coltman, 2009; Festa-Bianchet & Côté, 2008). As of  
126 2017, CR was home to about 30 marked mountain goat individuals. This landscape only provides  
127 high quantities of quality forage during the summer months (June-August), while the rest of the  
128 year it is largely covered in snow or ice and forage availability is limited (Festa-Bianchet &  
129 Cote, 2008). Altitudinal migration does not occur in this population. Ship Mountain and Yes Bay  
130 (YB; 56N, -132W) each harbor relatively small (n = 40-50 individuals), geographically isolated  
131 populations located along the Cleveland Peninsula, southeastern Alaska, United States. Mountain

132 goats on the Cleveland Peninsula are native and are genetically and morphologically distinct  
133 from surrounding mainland populations (Breen et al., submitted). Notably, mountain goats from  
134 this region are influenced by a maritime climate and seasonally migrate to low elevations during  
135 winter (Fox & Smith, 1988; Smith & Raedeke, 1982). Available diet information for the sampled  
136 populations is found in Supplementary Table S1.

### 137 **Sample collection and DNA extraction**

138 Fresh mountain goat fecal samples (~10 pellets) were collected from CZ (August 2016),  
139 SM (July 2016), and YB (July 2016). Larger samples (>10 pellets) were collected from CR  
140 during the summer months (June-August 2016). Samples were collected at CR after observing  
141 groups of mountain goats defecate, where as those in Alaska were collected by searching areas  
142 mountain goats were observed that day. Mountain goats typically defecate in defined, non-  
143 overlapping pellet groups and we only selected samples that were clearly from a single  
144 individual. Due to the nature of the sampling we were unable to sex or age the animal that  
145 defecated. The cool, alpine climate of the sampling environment naturally preserves samples and  
146 thus we do not suspect environmental contamination was a major factor. All samples (N=54),  
147 except those from CR, were stored immediately in 70% ethanol (EtOH) and at -20°C. CR  
148 samples were stored individually in plastic sample bags at -20°C. All surfaces were sterilized  
149 with 90% EtOH and 10% bleach solution to prevent environmental contamination. A small  
150 portion of a single fecal sample (~1/4 including exterior and interior portions) was digested over  
151 night at 56°C in 20 ul proteinase K and 180 ul Buffer ATL from the Qiagen DNeasy Blood &  
152 Tissue Kit. The gDNA was extracted from the digest by the Qiagen AllPrep PowerFecal  
153 DNA/RNA Kit following manufacturers protocol (Qiagen 80244).

### 154 **Quality assessment and library preparation**

155 Species identification was confirmed for SM samples as the population is sympatric with  
156 Sitka black-tailed deer (*Odocoileus hemionus sitkensis*). The mitochondrial D-Loop was  
157 amplified using L15527 and H00438 primers (Wu et al. 2003) and sequenced on an ABI 3730  
158 (Applied Biosystems). The consensus sequences generated in BioEdit (v 7.0.4.1) were screened  
159 using NCBI BLAST to identify the species. For all known mountain goat fecal samples DNA  
160 concentrations were measured with a Qubit 3.0 Fluorometer per manufacturers protocol

161 (Invitrogen). Samples were concentrated if the extracted concentration of extracted fecal DNA  
162 was below 3 ng/ul. The validated Illumina 16S rRNA Metagenomic Sequencing Library  
163 Preparation (#15044223 rev. B) protocol was then followed for library preparation (Rimoldi et  
164 al., 2018). The 16S ribosomal ribonucleic acid (16S rRNA) hypervariable region, specifically the  
165 V3 and V4 regions, were targeted with four variants of 341F and 805R primers using the primers  
166 designed by Herlemann et al., 2011. A unique combination of Nextera XT indexes, index 1 (i7)  
167 and index 2 (i5) adapters were assigned to each sample for multiplexing and pooling.

168 Four replicates of each sample of fecal gDNA were amplified in 25 ul PCR using the  
169 341F and 805R primers. The replicated amplicons for each sample were combined into a single  
170 reaction of 100 ul and purified using a QIAquick PCR Purification Kit (Qiagen, 28104) and  
171 quantified on the Qubit Fluorometer. Sample indexes were annealed to the amplicons using an 8-  
172 cycle PCR reaction to produce fragments approximately 630 bp in length that included ligated  
173 adaptors; the target amplicon is approximately 430 bp in length (Illumina 16S rRNA  
174 Metagenomic Sequencing Library Preparation; #15044223 rev. B). Aliquots of 100 ng DNA for  
175 each sample were pooled together and purified with the QIAquick PCR Purification Kit for a  
176 final volume of 50 ul. The final purified library was validated by TapeStation (Agilent,  
177 G2991AA) and sequenced in 300 bp pair-end reads on an Illumina MiSeq sequencer at the  
178 Genomic Facility of Guelph University (Guelph, Ontario).

## 179 **Analysis**

### 180 **Bioinformatics and taxonomic evaluation**

181 The quality of the raw sequences was assessed with FastQC (v 0.11.4) and the low-  
182 quality cut-off for forward and reverse reads was determined. Forward and reverse reads were  
183 then imported into QIIME2 (v 2018.6) for quality control, diversity analysis, and sequence  
184 classification. The quality control function within QIIME2, DADA2, was used to truncate  
185 forward and reverse reads and perform denoising, and the detection and removal of chimeras.  
186 The results of DADA2 with only forward, reverse, and merged reads were analyzed  
187 independently; note QIIME2 follows the curated DADA2 R library workflow  
188 (<https://benjjneb.github.io/dada2/>) that requires zero mismatches in overlapping reads for  
189 successful merging, since reads are denoised and errors are removed before merging occurs.

190 Sequencing data were grouped by status (captive or wild), population (CZ, CR, SM, or YB), and  
191 collection time (samples from CR collected in June, July, or August) for analytical purposes.

192 Alpha diversity estimates of community richness included Shannon Index and observed  
193 OTUs and estimates of community evenness included Pielou's evenness. A phylogenetic tree  
194 was developed in QIIME2 for beta diversity estimates (Supplementary Figure S6). Pairwise  
195 sample estimates (beta diversity) included Bray-Curtis, unweighted UniFrac, and weighted  
196 UniFrac dissimilarity distance matrices. The taxonomy, to the species level, of all sample reads  
197 were assigned using Silva 132 reference taxonomy database  
198 (<https://docs.qiime2.org/2019.1/data-resources/>). The relative proportion of *Firmicutes* to  
199 *Bacteroidetes* was calculated for each of the grouped data as variation in the ratio is associated  
200 with individual body condition (Donaldson et al., 2006; Ley et al., 2006). For this analysis  
201 samples within the groupings were normalized and rarified to the sample with the fewest contigs  
202 (6,096 contigs for population and status; and, 7,342 contigs for collection month).

### 203 **Statistical analysis and visualization**

204 Differences in community richness and evenness by groupings were assessed with the  
205 Kruskal-Wallis rank sum test and p-values were adjusted using Benjamini & Hochberg  
206 correction (q-values; Storey, 2002). All taxonomic analysis and visualization were computed  
207 with the unclassified reads removed. A Wilcoxon rank sum test with continuity correction was  
208 used to assess the differences in relative abundance of taxonomic classifications based on origin  
209 with all unclassified sequences removed. A Kruskal-Wallis rank sum test was used to assess the  
210 differences in relative abundance of taxonomic classifications based on collection month.  
211 Differences were treated as significant if the p-value was < 0.01 and a post-hoc (Dunn) test was  
212 conducted to determine where the differences occurred between the three collection times.

213 Statistical PERMANOVA tests were conducted using the ADONIS function from the R  
214 package Vegan (v 2.5.2) on Bray Curtis dissimilarity matrices to test for the presence of shifts in  
215 the microbiome communities between groups. A detrended correspondence analysis (DCA) was  
216 conducted to determine significant communities between groups at each taxonomic level, with  
217 only the taxonomic level with the highest resolution (species) reported and visualized. A  
218 principle coordinates analysis (PCoA) was also conducted using Bray Curtis dissimilarity



219 matrices. Data were visualized with the ggplot2 (v 2.3.0.0) package in RStudio (v 3.4.1).  
220 Additional materials associated with the analysis are available on Dryad (Accession no.  
221 XXXXX) and relevant scripts are available on GitLab ([https://gitlab.com/WiDGeT\\_TrentU](https://gitlab.com/WiDGeT_TrentU)).

## 222 **Results**

### 223 **Samples and quality filtering**

224 A total of 54 fecal samples were selected for this study, but seven samples from SM were  
225 excluded because of > 95% identification as black-tailed Sitka deer and five were excluded for  
226 quality reasons. A total of ~ 5.37 million paired-end reads were generated from the remaining 42  
227 fecal samples (SRA accession number PRJNA522005). FastQC analysis indicated that both  
228 forward and reverse reads lost quality > 250 bp in length (Phred score < 25), so all reads were  
229 trimmed to a length of 250 bp and following DADA2 quality filtering, resulted in 896,534 high  
230 quality overlapping reads (contigs) kept for taxonomic and diversity analyses. The sequence  
231 breakdown for each group can be seen in Supplementary Table S2. Analyses were also  
232 conducted on each read set individually, but we only report the results for the merged reads as  
233 the patterns were qualitatively similar (just considerably more data). Contigs that were classified  
234 to Archaeal lineages (6,013 contigs) were removed from the analysis. The remaining 890,521  
235 contigs were classified into 3,886 unique 16S rRNA ribosomal sequence variants (RSVs) with at  
236 least 1 representative sequence, and 3,854 unique RSVs with at least 10 representative  
237 sequences.

### 238 **Assessing diversity and species composition across groups**

239 The three alpha diversity metrics did not show any differences between the captive and  
240 wild populations (q-value > 0.89 for all comparisons; Supplementary Table S3; Figure 2);  
241 however, there were more unique classifications in wild than in captive mountain goats  
242 (Supplementary Table S4). Across the four populations, the alpha diversity metrics did not differ  
243 (q-value > 0.57 for all comparisons), but moderate differences between the collection months at  
244 CR were observed (q-value = 0.04 for all comparisons; Supplementary Table S3; Figure 2), with  
245 a trend toward decreasing diversity as the summer progressed. The significant differences (q-  
246 value < 0.01) in the taxonomies observed between June-July, June-August, and July-August at

247 CR were contributed by 3 classes, 4 families, 3 genera, and 3 species (Supplementary Table S6),  
248 and there was no difference in the phyla or orders observed between any months.

249 The top two phyla based on averaged relative abundance were *Firmicutes* and  
250 *Bacteroidetes* (Table 1; Table 2). The important distinguishing taxonomic differences (p-value <  
251 0.01) between captive and wild mountain goats arose from a suite of different groups, ranging  
252 from three different phyla to 26 different species (Supplementary Table S5; Figure 3). Notably of  
253 the top five groups, they only differed by a *Spirochaetes* identification for captive and by  
254 *Proteobacteria* for wild mountain goats (Table 1; Table 2). A similar pattern was observed  
255 across populations (Table 1; Table 2) and likewise, *Firmicutes* and *Bacteroidetes* ratios were  
256 more-or-less consistent, and only one genus differed across months (Table 2).

## 257 **Quantifying drivers of microbial diversity**

258 A 4-way PERMANOVA of the Bray Curtis dissimilarity matrix indicated that the captive  
259 and wild mountain goats had significant shifts (p<0.001) in their microbiome communities  
260 (Table 3; Figure 2). The same pattern was observed across populations (p<0.001) and over time  
261 (p=0.018; Table 3). The DCA (at the species level) clearly separated captive from wild as well as  
262 the four sampled populations (Figure 4). Similarly, the PCoA at the species level, based on Bray  
263 Curtis dissimilarity, weighted UniFrac, and unweighted UniFrac, clearly separated captive from  
264 wild as well the four sampled populations (Supplementary Figure S4-S6). No temporal  
265 groupings were observed (Figure 4; Supplementary Figures S4-S6), despite the PERMANOVA  
266 patterns (Table 3).

## 267 **Discussion**

268 The structure of the fecal microbiome is influenced by a multitude of biotic and abiotic  
269 host-specific factors, including genetics, diet, environment, and health status (Bahrndorff et al.,  
270 2016). While unaccounted factors such as age and sex likely contribute to variation in the  
271 microbiome (Kook et al., 2018; Bennett et al., 2016; Million et al., 2013), we observed clear  
272 effects of captivity (Fig. 3; 4) and trends suggestive of a seasonal effect (Fig. 2; Table 3. This  
273 study should therefore inform both basic and applied research of ungulate microbiomes, and  
274 potentially inform the management of this enigmatic species by identifying the composition of

275 microbial populations in wild, healthy individuals. Specifically, there is a mounting body of  
276 evidence that links the fecal microbiome to the health of individuals and these links may be  
277 useful tools in guiding population management in captive and wild populations (Bahrndorff et  
278 al., 2016; Pannoni, 2015). Moreover, given the links between host-microbiome and adaptive  
279 responses (Webster et al., 2017; Ziegler et al. 2017), it is conceivable that population-level  
280 microbiome divergence could, and likely should, be factored into the designation of evolutionary  
281 significant units (*sensu* Moritz, 1994) and predictive models as it pertains to adaptive responses.

## 282 **Comparing diversity metrics**

283 Most mammalian microbiome comparisons to date have shown significant decreases in  
284 the alpha diversity (diversity and evenness) in captive ruminant populations; however, there are  
285 also studies that show no changes or even increases in diversity in captive populations in other  
286 mammals (McKenzie et al., 2017; Kohl et al., 2014). In Bovidae, McKenzie et al. (2017) showed  
287 no statistical difference between captive and wild groups, which was also observed in this study  
288 on mountain goats. This finding suggests that, for the mountain goats at the Calgary Zoo,  
289 captivity has played little effect on overall microbiome diversity, but rather microbiome  
290 community structure (Figures 2, 3). Community diversity estimates for mountain goats were also  
291 comparable to other unique ruminant populations, such as muskoxen (*Ovibos moschatus*),  
292 Bactrian camel (*Camelus bactrianus*), and Norwegian reindeer (*Rangifer tarandus tarandus*), but  
293 less comparable to roe deer (*Capreolus capreolu*) and dzo (*Bos grunniens* and *Bos taurus* hybrid;  
294 He et al., 2018; Salgado-Flores et al., 2016).

295 There are strong seasonal dynamics in activity, diet, and body condition in wild mountain  
296 goats that could lead to disparity between the microbiome community diversity we measured in  
297 mountain goats, and other studies from ruminant species. In particular, mountain goats appear to  
298 lose and regain a significant amount of body mass (up to 30-40%) between winter and summer  
299 (Côté and Festa-Bianchet, 2003) and are exposed to environmental extremes (e.g. 0 to 25°C).  
300 Such dynamics may provide important context for understanding seasonal changes in the  
301 microbiome. For example, during spring and early summer animals, particularly parturient  
302 females, might be oriented to obtaining, absorbing, and utilizing nutrients whereas later in late-  
303 summer and fall may be storing nutrients for periods of winter scarcity.

304 The dominance of *Firmicutes* and *Bacteroidetes* phyla is consistent with other ruminant  
305 studies (O' Donnell et al., 2017). There were minimal changes in the relative percent *Firmicutes*  
306 (from 75% to 72%) and increases in the relative classified *Bacteroidetes* (from 16% to 17%)  
307 from wild to captive mountain goats, which is consistent with the general mammalian trends  
308 observed in McKenzie et al. (2017). The *Firmicutes* to *Bacteroidetes* ratio (F/B) has been used to  
309 give a rough estimate of the function of the microbiome, where a higher F/B ratio in treatment  
310 groups compared to control groups in mice and humans has generally been linked with diseases  
311 such as obesity and an elevated body mass index (BMI; Koliada et al., 2017). Koliada et al.,  
312 (2017) suggested that the association between increase F/B ratios and elevated BMIs arises from  
313 *Firmicutes*, a group linked with nutrition absorption and circulation, being more efficiently able  
314 to participate in energy utilization than *Bacteroidetes*, a group more associated with nutrition  
315 storage. Therefore, increases in the relative abundance of *Firmicutes* can significantly contribute  
316 to the hosts' elevated BMI phenotype. The diets of ruminants are typically low in nutrients,  
317 especially during winter months, and the elevated F/B ratio in mountain goats detected in our  
318 summer samples, relative to some other ruminants, suggests that the metabolism efforts of  
319 mountain goat microbiomes are driven to obtain and absorb, rather than store, nutrition; a pattern  
320 consistent with expected seasonal energy balance strategies of northern ungulates.  
321 *Actinobacteria*, another phylum detected in mountain goats, is associated with body condition  
322 (e.g. BMI) and might contribute to the immune system of the host (Koliada et al., 2017; Ventura  
323 et al., 2007). An important next step will be to link F/B ratio and relative abundance of  
324 *Actinobacteria* to phenotypic attributes like body condition and mass in mountain goats, which is  
325 possible in both a captive (CZ) and wild (CR) setting.

### 326 **Detectable shifts in microbiome community compositions**

327 There were significant shifts in the fecal microbiome community composition between  
328 the four different population groups. However, an  $R^2$  value of 0.09 suggests that there are  
329 multiple factors, beyond population origin, driving the shifts seen in the fecal microbiome  
330 communities. Unmeasured factors like age, sex, and reproductive status would likely explain  
331 some of the remaining variation; still, there was considerably less variation explained by captive  
332 and wild group designation ( $R^2=0.03$ ). The spatial differences thus are more prominent in  
333 shaping fecal microbial composition than that of captivity, and our model fit is consistent with

334 other comparisons of captive and wild groups of ruminants (McKenzie et al., 2018). Here we  
335 speculate that the northern latitude or geographic isolation of the Alaskan population has  
336 contributed to reduced fecal microbiome diversity in terms of species number (Shafer et al.,  
337 2012; Table S4), while the shifts at the phyla level are consistent with diet alterations between  
338 captive and wild animals with similar patterns seen in Sika deer (Guan et al., 2017).

339 Interestingly, sample time at CR had the best model fit ( $R^2=0.15$ ;  $p=0.018$ ), where the  
340 most different genera ( $p < 0.001$ ) between June and July was the *Eubacterium hallii* group  
341 (increased in July); similarly, *Clostridiales family XIII AD3011* group and *Eubacterium hallii*  
342 groups increased in July. The *Eubacterium hallii* group is a commonly observed genus in  
343 mammal microbiomes and plays a role in glycolysis (Engels et al., 2016); we suggest that the  
344 increase of *Eubacterium hallii* group in July relative to June or August might be associated with  
345 shifts in forage quality during the peak of summer at CR. Importantly, while the core fecal  
346 microbiome appears relatively constant in the mountain goat, at the local-level there are clear  
347 shifts in individual bacteria that reflect changes in the microhabitat over time.

## 348 **Conclusion**

349 We are beginning to understand how the fecal microbiome influences the host and is, in turn,  
350 influenced by the host. There is a need to understand how to best apply this knowledge to aid the  
351 management and conservation of mammal populations (Li et al., 2018; O' Donnell et al., 2017).  
352 The direct connection of the fecal microbiome to both individual and population health makes  
353 fecal microbiome assays an important tool for monitoring the health and disease trends of  
354 domesticated, captive, and wild populations of mammals (Bahrndorff et al., 2016; Jiménez &  
355 Sommer, 2017). This study shows that there are clear differences in fecal microbiome  
356 community composition, but not diversity, that can be best explained by a combination of  
357 factors, including status, seasonality and population of origin. The baseline microbiome data  
358 described here thus has the potential to provide valuable insight into the health of wild mountain  
359 goat populations and represents an important frame of reference for the development of future  
360 monitoring programs and associated management strategies.

## 361 **Funding**

362 This work was supported by Natural Sciences and Engineering Research Council of  
363 Canada Discovery Grant [ABAS and SDC]; Natural Sciences and Engineering Research Council  
364 of Canada Undergraduate Student Research Award [SEH]; Alaska Department of Fish and Game  
365 – Division of Wildlife Conservation (KW; WRG-AKW-19-6.0); ComputeCanada; Canadian  
366 Foundation for Innovation: John R. Evans Leaders Fund; and Trent University start-up funds  
367 [ABAS].

## 368 **Acknowledgments**

369 We thank Doug Whiteside (Calgary Zoo), Daria Martchenko, Boyd Porter, and Yasaman  
370 Shakeri for helping with sample collection. Jess Breen and Spencer Anderson helped with  
371 aspects of library preparation. Justin Johnson helped develop the sample map. Erica Newton for  
372 support in R statistical analysis and figure development. We thank three anonymous reviewers  
373 for their comments that improved this manuscript. The authors declare that they have no  
374 competing interests.

## 375 **References**

- 376 Allali I, Delgado S, Marron PI et al. Gut microbiome compositional and functional differences  
377 between tumor and non-tumor adjacent tissues from cohorts from the US and Spain. *Gut*  
378 *Microbes* 2015;6(3):161–172.
- 379 Amato KR, Sander JG, Song SJ et al. (2018). Evolutionary trends in host physiology outweigh  
380 dietary niche in structuring primate gut microbiomes. *ISME J* 2018, DOI: 10.1038/s41396-018-  
381 0175-0.
- 382 Amato KR, Yeoman CJ, Kent A, et al. Habitat degradation impacts black howler monkey  
383 (*Alouatta pigra*) gastrointestinal microbiomes. *ISME J* 2013;7(7):1344–53.
- 384 Auffret MD, Dewhurst RJ, Duthie CA, et al. The rumen microbiome as a reservoir of  
385 antimicrobial resistance and pathogenicity genes is directly affected by diet in beef cattle.  
386 *Microbiome* 2017;5:159.
- 387 Bahrndorff S, Alemu T, Alemneh T et al. The microbiome of animals: implications for  
388 conservation biology. *Int J Genomics* 2016:5304028.
- 389 Baldo L, Pretus JL, Riera JL et al. Convergence of gut microbiotas in the adaptive radiation of  
390 African cichlid fishes. *ISME J* 2017;11:1975-87.
- 391 Bennett G, Malone M, Sauter ML, et al. Host age, social group, and habitat type influence the  
392 gut microbiota of wild ring-tailed lemurs (*Lemur catta*). *Am J Primatol* 2016;78(8):883-92.

- 393 Berg RD. The indigenous gastrointestinal microflora. *Trends Microbiol* 1996;4(11):227-310.
- 394 Bik EM, Costello EK, Switzer AD, et al. Marine mammals harbor unique microbiotas shaped by  
395 and yet distinct from the sea. *Nat Commun* 2016;7:10516.
- 396 Breen J, Britt M, Martchenko D et al. Extensive field-sampling reveals the uniqueness of a  
397 trophy mountain goat population. *J Wildl Manag* 2018 [Submitted].
- 398 Buret AG. Good bugs, bad bugs in the gut: the role of microbiota dysbiosis in chronic  
399 gastrointestinal consequences of infection. *Am J Gastroenterol Suppl* 2016;3(2):25–32.
- 400 Carey HV, Walters WA, Knight R. Seasonal restructuring of the ground squirrel gut microbiota  
401 over the annual hibernation cycle. *Am J Physiol Regul Integr Comp Physiol* 2013;304:R33–  
402 RR42.
- 403 Carthey AJR, Gillings MR, Blumstein DT. The extended genotype: microbially mediated  
404 olfactory communication. *Trends Ecol and Evol* 2018;33(11):885-94.
- 405 Cayrou C, Sambe B, Armougom F et al. Molecular diversity of the Planctomycetes in the human  
406 gut microbiota in France and Senegal. *APMIS* 2013;121(11):1082-90.
- 407 Clayton JB, Al-Ghalith GA, Long HT, et al. Associations Between Nutrition, Gut Microbiome,  
408 and Health in A Novel Nonhuman Primate Model. *Sci Rep* 2018;8(1):11159.
- 409 Côté, S. D. and M. Festa-Bianchet. 2003. Mountain goat. In *Wild mammals of North America:*  
410 *biology, management and conservation*, 2<sup>nd</sup> edition. G. A. Feldhamer, B. C. Thompson & J. A.  
411 Chapman (eds). *The John Hopkins University Press*, Pp. 1061-1075.
- 412 Di Marco M, Boitani L, Mallon D, et al. A retrospective evaluation of the global decline of  
413 carnivores and ungulates. *Conserv Biol* 2014;28(4):1109-18.
- 414 Dikongué E, Ségurel L. Latitude as a co-driver of human gut microbial diversity? *Bioessays*  
415 2017;39(3).
- 416 Donaldson GP, Lee SM, Mazmanian SK. Gut biogeography of the bacterial microbiota. *Nat Rev*  
417 *Microbiol* 2015;14(1):20–32.
- 418 Engels C, Ruscheweyh HJ, Beerenwinkel N et al. The common gut microbe *Eubacterium hallii*  
419 also contributes to intestinal propionate formation. *Front Microbiol* 2016;7:713.
- 420 Feng Q, Chen WD, Wang YD. Gut microbiota: an integral moderator in health and disease.  
421 *Front Microbiol* 2018; 9:151.
- 422 Festa-Bianchet M, Côté SD. Mountain goats: ecology, behavior, and conservation of an alpine  
423 ungulate (1st ed.). Washington, D.C.: *Island Press*, 2008.
- 424 Festa-Bianchet, M. 2008. *Oreamnos americanus*. The IUCN red list of threatened species 2008:  
425 e.T42680A10727959. DOI: 10.2305/IUCN.UK.2008.RLTS.T42680A10727959.en.

- 426 Fox JL, Smith CA. Winter mountain goat diets in southeast Alaska. *J Wildlife Manag*  
427 1988;52(2):362-5.
- 428 Gogul G, Gaffney J, Baden AL, et al. Evolutionary trends in host physiology outweigh dietary  
429 niche in structuring primate gut microbiomes. *ISME J* 2018, DOI: 10.1038/s41396-018-0175-0.
- 430 Gomez DE, Arroyo LG, Costa MC et al. Characterization of the fecal bacterial microbiota of  
431 healthy and diarrheic dairy calves. *J Vet Intern Med* 2017;31(3):928–39.
- 432 Gray LEK, O’Hely M, Ranganathan S, et al. The maternal diet, gut bacteria, and bacterial  
433 metabolites during pregnancy influence offspring asthma. *Front Immunol* 2017;8:365.
- 434 Guan Y, Yang H, Han S, et al. Comparison of the gut microbiota composition between wild and  
435 captive sika deer (*Cervus nippon hortulorum*) from feces by high-throughput sequencing. *AMB*  
436 *Express* 2017;7:212.
- 437 Hale VL, Tan CL, Niu K, et al. Diet versus phylogeny: a comparison of gut microbiota in captive  
438 Colobine monkey species. *Microb Ecol* 2018;75(2):515-27.
- 439 Hamel S, Côté S. Habitat use patterns in relation to escape terrain: are alpine ungulate females  
440 trading off better foraging sites for safety? *Can J Zool* 2007;85:933-43.
- 441 He J, Yi L, Hai L, et al. Characterizing the bacterial microbiota in different gastrointestinal tract  
442 segments of the Bactrian camel. *Sci Reports* 2018;8:654.
- 443 Herlemann DP, Labrenz M, Jürgens K, et al. Transitions in bacterial communities along the  
444 2000 km salinity gradient of the Baltic Sea. *ISME J* 2011;5(10):1571–9.
- 445 Hicks AL, Lee KJ, Couto-Rodriguez M, et al. Gut microbiomes of wild great apes fluctuate  
446 seasonally in response to diet. *Nat Commun* 2018;9(1):1786.
- 447 Hu X, Liu G, Li Y, et al. High-Throughput Analysis Reveals Seasonal Variation of the Gut  
448 Microbiota Composition Within Forest Musk Deer (*Moschus berezovskii*). *Front Microbiol*  
449 2018;9:1674.
- 450 Huntington G, Woodbury M, Anderson VPAS. Invited Review: Growth, voluntary intake, and  
451 digestion and metabolism of North American bison. *Applied Animal Sci* 2019;35(2):146-60.
- 452 Ingala MR, Simmons NB, Wultsch C, et al. Comparing Microbiome Sampling Methods in a  
453 Wild Mammal: Fecal and Intestinal Samples Record Different Signals of Host Ecology,  
454 Evolution. *Front Microbiol* 2018;9:803.
- 455 Jakobsson HE, Abrahamsson TR, Jenmalm MC et al. Decreased gut microbiota diversity,  
456 delayed *Bacteroidetes* colonisation and reduced Th1 responses in infants delivered by caesarean  
457 section. *Gut* 2014;63(4):559–66.
- 458 Jiménez RR, Sommer S. The amphibian microbiome: natural range of variation, pathogenic  
459 dysbiosis, and role in conservation. *Biodivers Conserv* 2017;26(4):763–86.



- 460 Khan MJ, Gerasimidis K, Edwards CA, et al. Role of gut microbiota in the aetiology of obesity:  
461 proposed mechanisms and review of the literature. *J Obesity* 2016, DOI: 10.1155/2016/7353642.
- 462 Kohl KD, Skopec MM, Dearing MD. Captivity results in disparate loss of gut microbial diversity  
463 in closely related hosts. *Conserv Physiol* 2014;2(1):cou009.
- 464 Koliada A, Syzenko G, Moseiko V et al. Association between body mass index and  
465 Firmicutes/Bacteroidetes ratio in an adult Ukrainian population. *BMC Microbiol* 2017;17:120.
- 466 Kook SY, Kim Y, Kang B, et al. Characterization of the fecal microbiota differs between age  
467 groups in Koreans. *Intest Res* 2018;16(2):246–254.
- 468 Kreisinger J, Schmiedová L, Petrželková A et al. Fecal microbiota associated with  
469 phytohaemagglutinin-induced immune response in nestlings of a passerine bird. *Ecol Evol*  
470 2018;8(19): 9793-9802.
- 471 Lecomte V, Kaakoush NO, Maloney CA et al. Changes in gut microbiota in rats fed a high fat  
472 diet correlate with obesity-associated metabolic parameters. *PLoS ONE* 2015;10(5):e0126931.
- 473 Ley RE, Turnbaugh PJ, Klein S, et al. Microbial ecology: human gut microbes associated with  
474 obesity. *Nature* 2006;444(7122):1022-3.
- 475 Li Y, Hu X, Yang S et al. Comparison between the fecal bacterial microbiota of healthy and  
476 diarrheic captive musk deer. *Front Microbiol* 2018;9:300.
- 477 Li Y, Hu X, Yang S, et al. Comparative analysis of the gut microbiota composition between  
478 captive and wild forest musk deer. *Front Microbiol* 2017;8:1705.
- 479 Lowrey B, Garrott RA, Miyasaki HM et al. Seasonal resource selection by introduced mountain  
480 goats in the southwest Greater Yellowstone Area. *Ecosphere* 2017;8(4): e01769.
- 481 Mainguy J, Côté SD, Festa-Bianchet M et al. Father–offspring phenotypic correlations suggest  
482 intralocus sexual conflict for a fitness-linked trait in a wild sexually dimorphic mammal. *Proc R*  
483 *Soc B Biol Sci* 2009;276(1675):4067–75.
- 484 Malmuthuge N, Griebel PJ, Guan LL. The gut microbiome and its potential role in the  
485 development and function of newborn calf gastrointestinal tract. *Front Vet Sci* 2015;2:36.
- 486 McKenzie VJ, Song SJ, Delsuc F et al. The effects of captivity on the mammalian gut  
487 microbiome. *Integr Comp Biol* 2017;57(4):690–704.
- 488 Million M, Lagier JC, Yahav D, et al. Gut bacterial microbiota and obesity. *Clin Microbiol Infect*  
489 2013;19(4):305-13.
- 490 Moritz C. Defining 'Evolutionarily Significant Units' for conservation. *Trends Ecol Evol*  
491 1994;9(10):373-5.

- 492 Muegge BD, Kuczynski J, Knights D et al. Diet drives convergence in gut microbiome functions  
493 across mammalian phylogeny and within humans. *Science* 2011;332(6032):970–4.
- 494 Nishida AH, Ochman H. (2017). Rates of gut microbiome divergence in mammals. *Mol Ecol*  
495 2018;27(8):1884-97.
- 496 Noel SJ, Attwood GT, Rakonjac J, et al. Seasonal changes in the digesta-adherent rumen  
497 bacterial communities of dairy cattle grazing pasture. *PLoS ONE* 2017;12(3):e0173819.
- 498 O’ Donnell MM, Harris HMB, Ross RP et al. Core fecal microbiota of domesticated herbivorous  
499 ruminant, hindgut fermenters, and monogastric animals. *Microbiologyopen*, 2017;6(5):e00509.
- 500 Pannoni SB. (Dissertation). Developing Microbial Biomarkers to Non-invasively Assess Health  
501 in Wild Elk (*Cervus canadensis*) Populations. University of Montana - Missoula, 2015.  
502 <https://scholarworks.umt.edu/utpp/66/>
- 503 Poole KG, Heard DC. Seasonal habitat use and movements of mountain goats, *Oreamnos*  
504 *americanus*, in east-central British Columbia. *Can Field Nat* 2003;117(4):565-76.
- 505 Rahman NA, Parks DH, Vanwonterghem I et al. A phylogenomic analysis of the bacterial  
506 phylum *Fibrobacteres*. *Front Microbiol* 2015;6:1469.
- 507 Ransom-Jones E, Jones DL, McCarthy AJ et al. The *Fibrobacteres*: an important phylum of  
508 cellulose-degrading bacteria. *Microb Ecol* 2012;63:267-81.
- 509 Rimoldi S, Terova G, Ascione C et al. Next generation sequencing for gut microbiome  
510 characterization in rainbow trout (*Oncorhynchus mykiss*) fed animal by-product meals as an  
511 alternative to fishmeal protein sources. *PLoS ONE* 2018;13(3):e0193652.
- 512 Roy S, Trinchieri G. Microbiota: a key orchestrator of cancer therapy. *Nat Rev Cancer*  
513 2017;17(5):271–85.
- 514 Salgado-Flores A, Bockwoldt M, Hagen LH et al. First insight into the faecal microbiota of the  
515 high Arctic muskoxen (*Ovibos moschatus*). *Microbial Genomics* 2016;2(7):e000066.
- 516 Shafer ABA, Northrup JM, White KS, Boyce MS, Côté SD, Coltman DW. Habitat selection  
517 predicts genetic relatedness in an alpine ungulate. *Ecol* 2012;93(6):1317-29.
- 518 Sharpton TJ. Role of the gut microbiome in vertebrate evolution. *mSystems* 2018;3:e00174-17.
- 519 Smith CA, Raedeke KJ. Group size and movements of a dispersed, low density goat population  
520 with comments on inbreeding and human impact. *Bienn Symp North Wild Sheep and Goat*  
521 *Counc* 1982;3:54-67.
- 522 Storey JD. A direct approach to false discovery rates. *J R Statist Soc B* 2002;64(3):479-98.
- 523 Sun B, Wang X, Bernstein S et al. Marked variation between winter and spring gut microbiota in  
524 free-ranging Tibetan macaques (*Macaca thibetana*). *Sci Rep* 2016;6:26035.

- 525 Van de Water JAJM, Melkonian R, Junca H et al. *Spirochaetes* dominate the microbial  
526 community associated with the red coral *Corallium rubrum* on a broad geographic scale. *Sci*  
527 *Reports* 2016;6:27277.
- 528 Vandeputte D, Falony G, Vieira-Silva S, et al. Stool consistency is strongly associated with gut  
529 microbiota richness and composition, enterotypes and bacterial growth rates. *BMJ Gut*  
530 2016;65(1)57-62:.
- 531 Ventura M, Canchaya C, Tauch A et al. Genomics of *Actinobacteria*: tracing the evolutionary  
532 history of an ancient phylum. *Microbiol Mol Biol Rev* 2007;71(3):495–548.
- 533 Webster NS, Reusch TBH. Microbial contributions to the persistence of coral reefs. *ISME J*  
534 2017;11(10):2167–74.
- 535 Wershow ST, DeChaine EG. Retreat to refugia: Severe habitat contraction projected for endemic  
536 alpine plants of the Olympic Peninsula. *Am J Bot* 2018 Apr;105(4):760-78.
- 537 Wu CH, Zhang YP, Bunch TD et al. Mitochondrial control region sequence variation within the  
538 argali wild sheep (*Ovis ammon*): evolution and conservation relevance. *Mammalia* 2003;67:109–  
539 18.
- 540 Zhang Z, Xu D, Wang L et al. Convergent evolution of rumen microbiomes in high-altitude  
541 mammals. *Curr Biol* 2016;26:1873-9.
- 542 Ziegler M, Seneca FO, Yum LK et al. Bacterial community dynamics are linked to patterns of  
543 coral heat tolerance. *Nat Commun* 2017;8:14213.

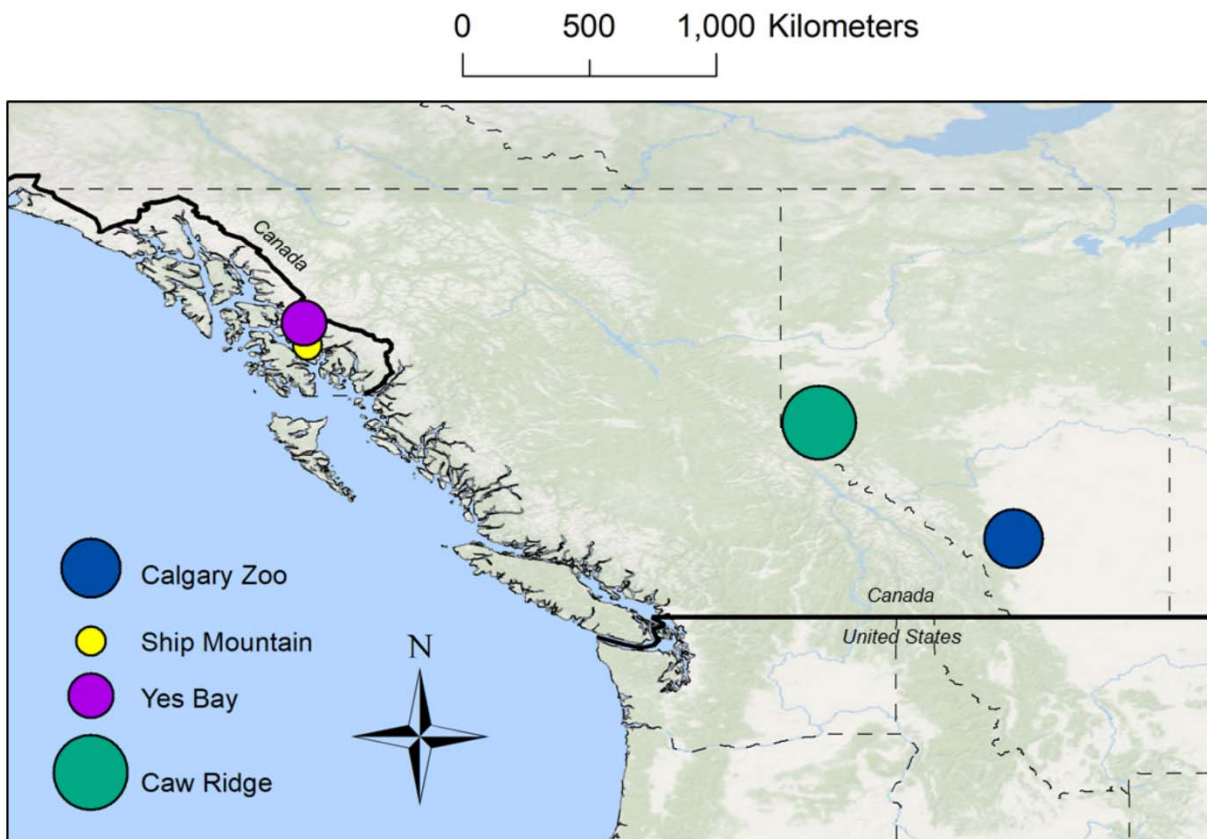

Figure 1. Geographical distribution of study sites in Alaska and Canada. The size of the points reflects the relative number of samples that originate from the study site.

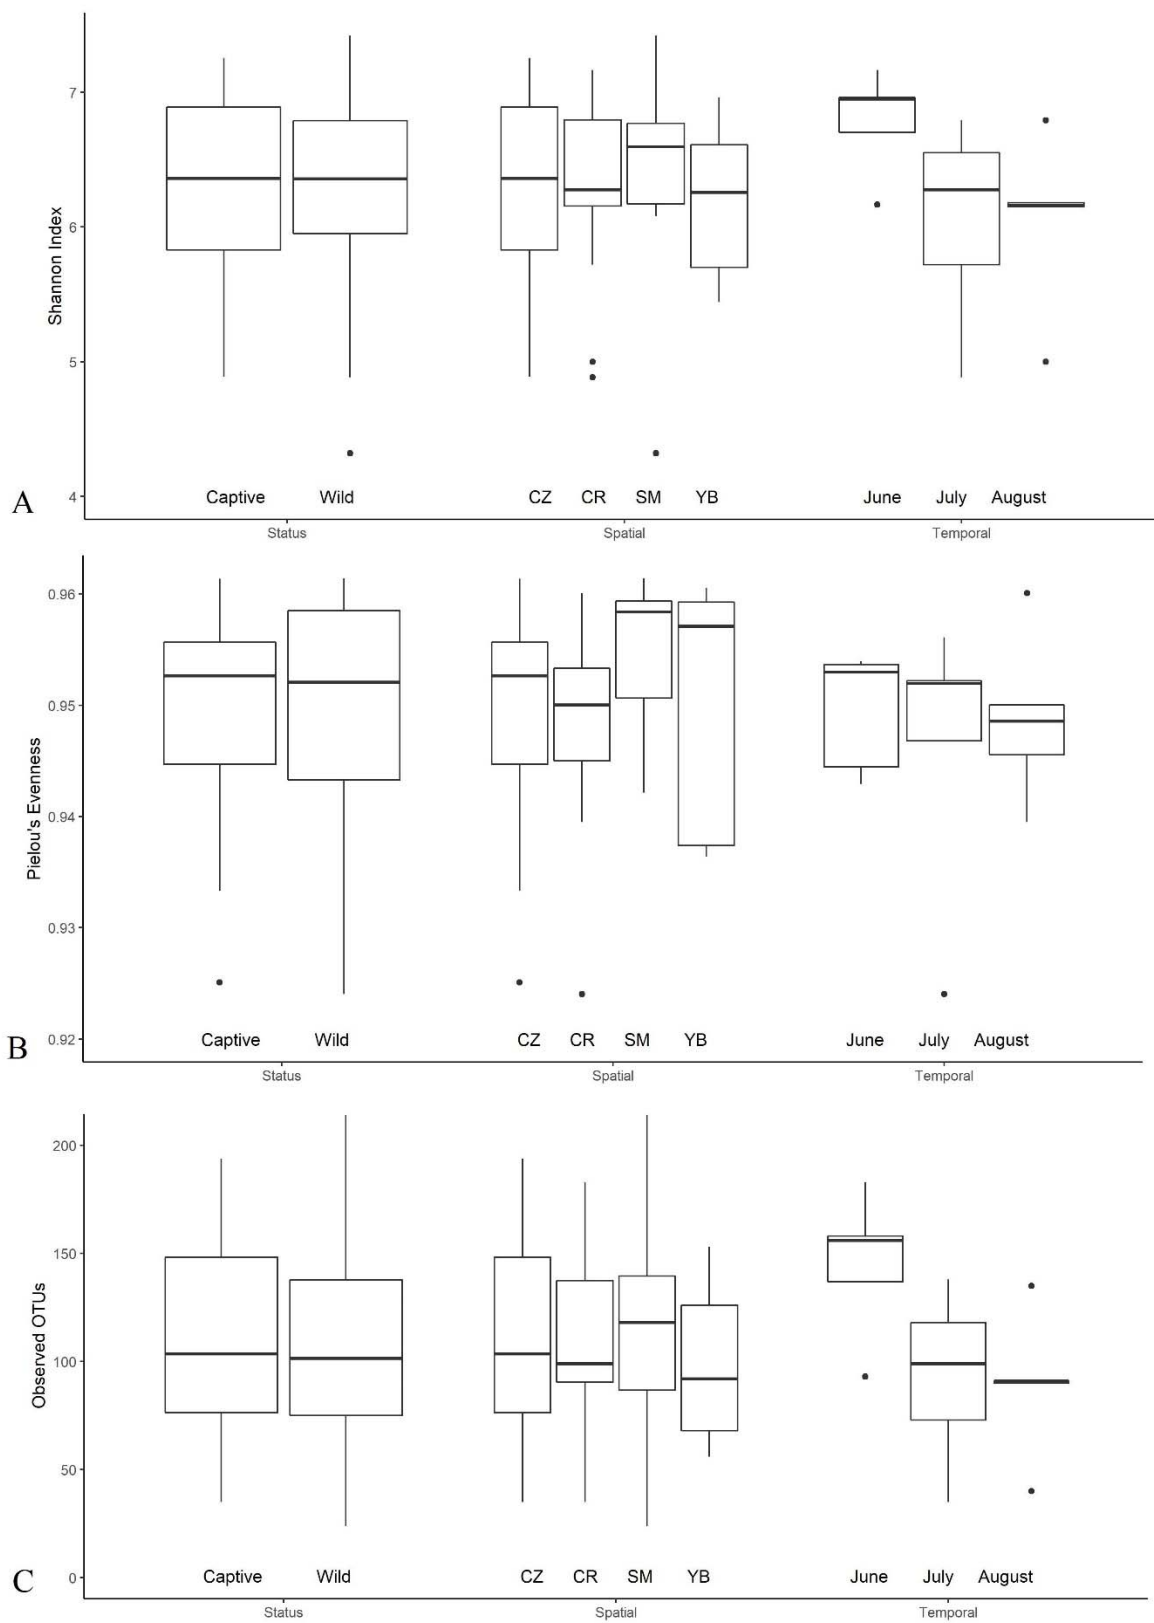

Figure 2. Median (horizontal lines), range (vertical lines) and interquartile range (box) from calculated alpha diversity measured from rarified samples for captive and wild mountain goats, spatial, and temporal comparisons: (A) Shannon Index reflecting community diversity, (B) Pielou's community evenness, and (C) observed number of operational taxonomic units (OTUs).

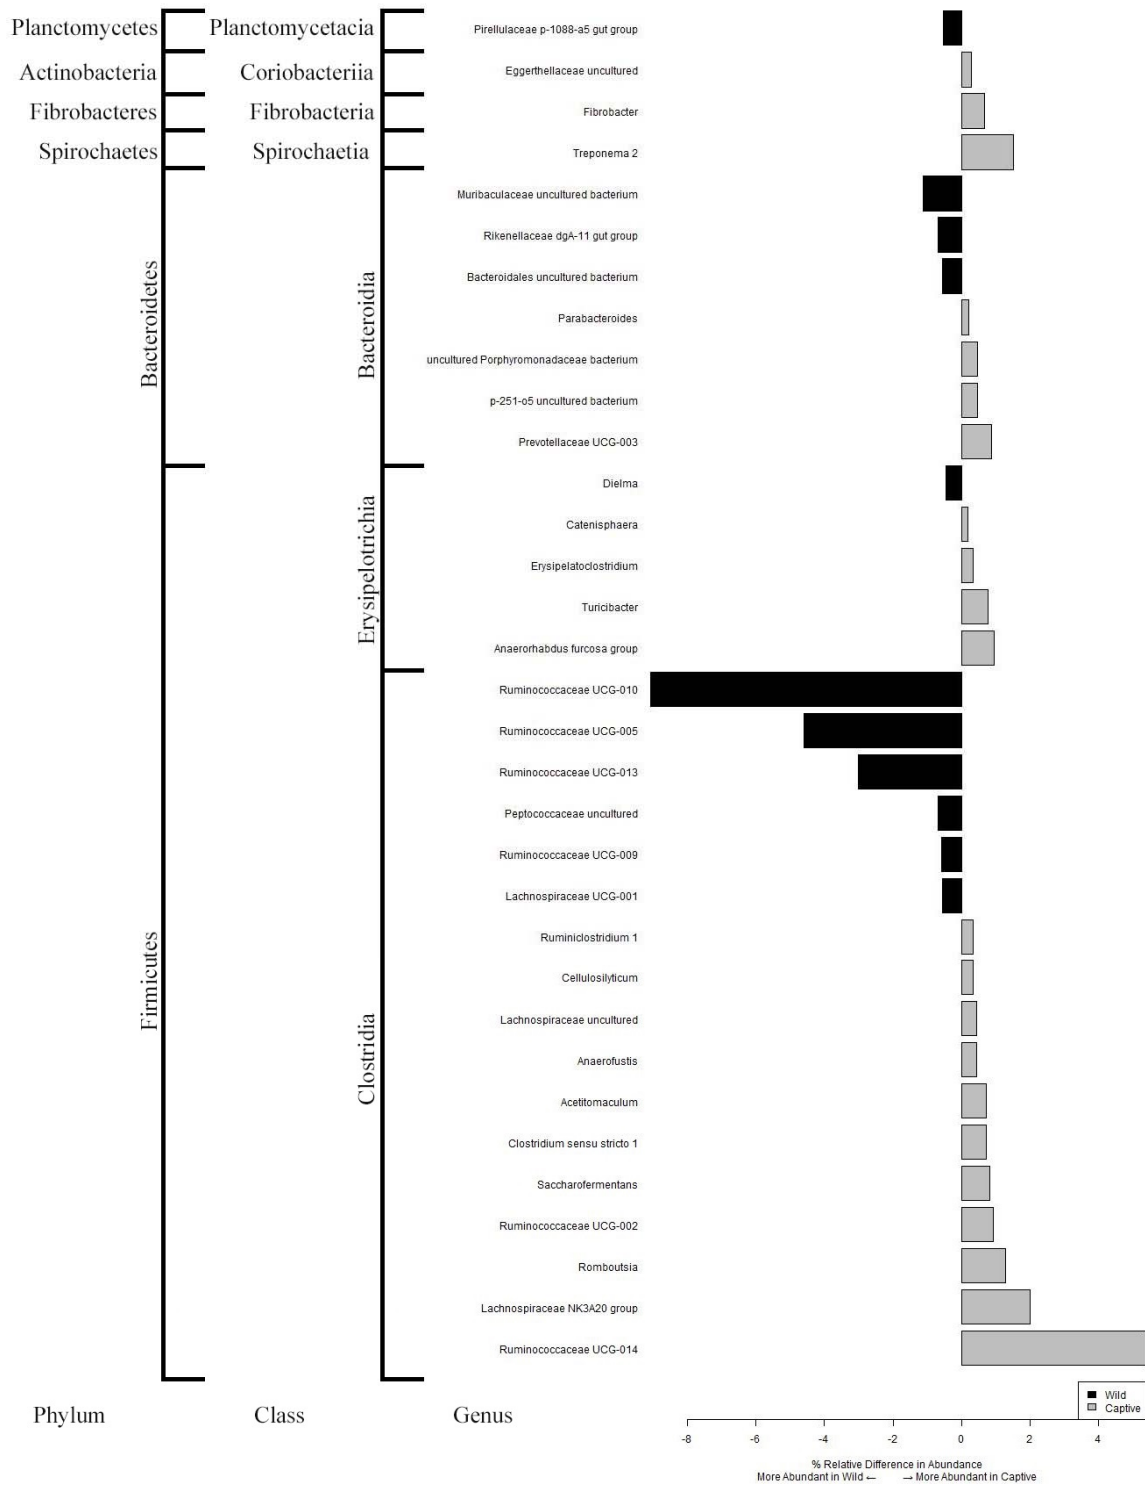

Figure 3. The difference in relative percent abundance of statistically significant genera (p-value < 0.01) that differ between captive and wild populations of mountain goats and their taxonomic breakdown at the phylum and class levels.

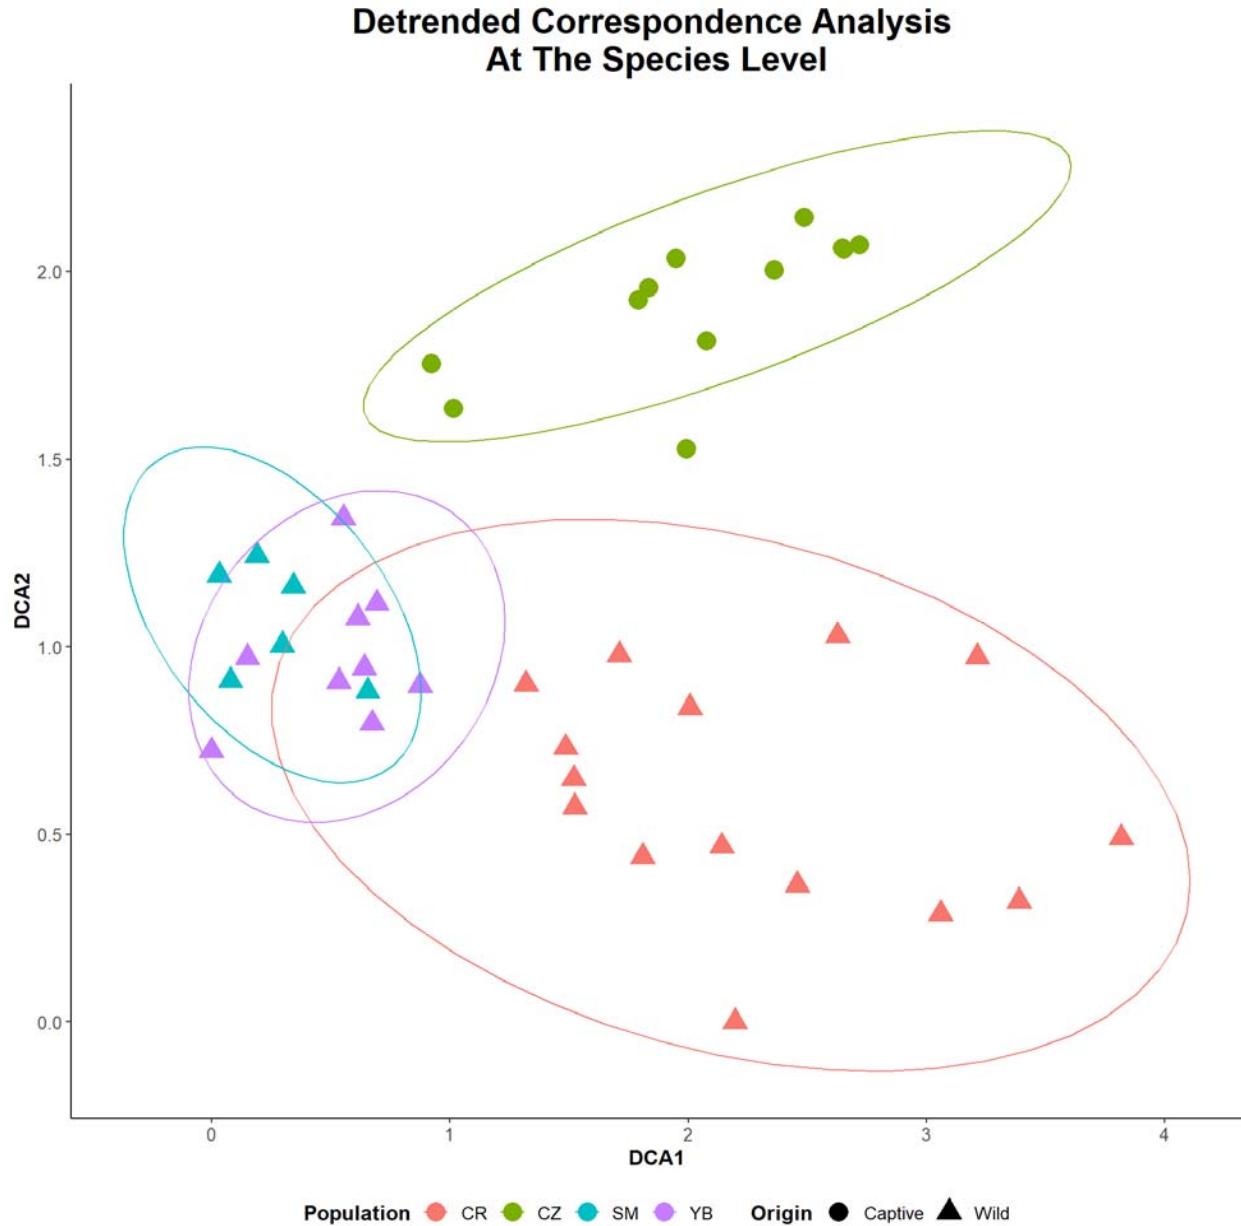

Figure 4. Visualization of the detrended correspondence analysis (DCA) conducted from the species level classification counts by origin and status. The distinction between origin, either Alberta (CR and CZ samples) or Alaska (SM and YB samples), is made clear by DCA1. The distinction between captive (circle samples) and wild (triangle samples) populations are made clear by DCA2.



Table 1. The top five microbiome phyla based on relative abundance for the four mountain goat populations (Calgary Zoo, Alberta = CZ; Caw Ridge, Alberta = CR; Ship Mountain, Alaska = SM; and Yes Bay, Alaska = YB), for captive and wild mountain goats, and for the different collection months at CR. The relative *Firmicutes* to *Bacteroidetes* ratios are also reported. Bolded groups represent a unique classification among groups.

| Group      |                   |                      |                  |                        |                            |                              |
|------------|-------------------|----------------------|------------------|------------------------|----------------------------|------------------------------|
| Status     |                   |                      | <i>F/B Ratio</i> |                        |                            |                              |
| Captive    | <i>Firmicutes</i> | <i>Bacteroidetes</i> | 4.35             | <i>Patescibacteria</i> | <b><i>Spirochaetes</i></b> | <i>Verrucomicrobia</i>       |
|            | 72%               | 17%                  |                  | 4.6%                   | 1.6%                       | 1.1%                         |
| Wild       | <i>Firmicutes</i> | <i>Bacteroidetes</i> | 4.73             | <i>Patescibacteria</i> | <i>Verrucomicrobia</i>     | <b><i>Proteobacteria</i></b> |
|            | 75%               | 16%                  |                  | 2.5%                   | 1.6%                       | 1.3%                         |
| Population |                   |                      |                  |                        |                            |                              |
| CZ         | <i>Firmicutes</i> | <i>Bacteroidetes</i> | 4.35             | <i>Patescibacteria</i> | <b><i>Spirochaetes</i></b> | <i>Verrucomicrobia</i>       |
|            | 72%               | 17%                  |                  | 4.6%                   | 1.6%                       | 1.1%                         |
| CR         | <i>Firmicutes</i> | <i>Bacteroidetes</i> | 5.63             | <i>Patescibacteria</i> | <i>Verrucomicrobia</i>     | <b><i>Actinobacteria</i></b> |
|            | 77%               | 14%                  |                  | 3.8%                   | 2.1%                       | 1.4%                         |
| SM         | <i>Firmicutes</i> | <i>Bacteroidetes</i> | 3.54             | <i>Proteobacteria</i>  | <b><i>Tenericutes</i></b>  | <b><i>Lentisphaerae</i></b>  |
|            | 71%               | 20%                  |                  | 2.8%                   | 1.7%                       | 0.93%                        |
| YB         | <i>Firmicutes</i> | <i>Bacteroidetes</i> | 4.49             | <i>Proteobacteria</i>  | <i>Patescibacteria</i>     | <i>Verrucomicrobia</i>       |
|            | 76%               | 17%                  |                  | 2.1%                   | 1.6%                       | 1.5%                         |
| Month      |                   |                      |                  |                        |                            |                              |
| June       | <i>Firmicutes</i> | <i>Bacteroidetes</i> | 4.18             | <i>Patescibacteria</i> | <i>Verrucomicrobia</i>     | <i>Actinobacteria</i>        |
|            | 74%               | 18%                  |                  | 3.5%                   | 1.3%                       | 0.93%                        |
| July       | <i>Firmicutes</i> | <i>Bacteroidetes</i> | 14.77            | <i>Actinobacteria</i>  | <i>Patescibacteria</i>     | <i>Verrucomicrobia</i>       |
|            | 86%               | 5.8%                 |                  | 3.2%                   | 3.1%                       | 0.97%                        |
| August     | <i>Firmicutes</i> | <i>Bacteroidetes</i> | 4.81             | <i>Patescibacteria</i> | <i>Verrucomicrobia</i>     | <b><i>Planctomycetes</i></b> |
|            | 74%               | 15%                  |                  | 5.4%                   | 3.2%                       | 0.67%                        |

Table 2. The top five microbiome genera, with relative percent classification, for all four mountain goat populations, for captive and wild mountain goats, and for the different collection months at Caw Ridge, Alberta. Bolded groups represent a unique classification among groups.

| Group      |                                                        |                                                         |                                                                              |                                                              |                                                         |
|------------|--------------------------------------------------------|---------------------------------------------------------|------------------------------------------------------------------------------|--------------------------------------------------------------|---------------------------------------------------------|
| Status     |                                                        |                                                         |                                                                              |                                                              |                                                         |
| Captive    | <i>Ruminococcaceae</i><br><i>UCG-014</i>               | <i>Eubacterium</i><br><i>coprostanoligenes</i><br>group | <i>Ruminococcaceae</i><br><i>UCG-005</i>                                     | <b><i>Bacteroides</i></b>                                    | <i>Christensenellaceae</i><br><i>R-7 group</i>          |
|            | 12%                                                    | 8%                                                      | 6%                                                                           | 6%                                                           | 5.6%                                                    |
| Wild       | <b><i>Ruminococcaceae</i></b><br><b><i>UCG-010</i></b> | <i>Ruminococcaceae</i><br><i>UCG-005</i>                | <i>Eubacterium</i><br><i>coprostanoligenes</i><br>group                      | <i>Ruminococcaceae</i><br><i>UCG-014</i>                     | <i>Christensenellaceae</i><br><i>R-7 group</i>          |
|            | 11%                                                    | 11%                                                     | 6.5%                                                                         | 6.2%                                                         | 6.1%                                                    |
| Population |                                                        |                                                         |                                                                              |                                                              |                                                         |
| CZ         | <i>Ruminococcaceae</i><br><i>UCG-014</i>               | <i>Eubacterium</i><br><i>coprostanoligenes</i><br>group | <i>Ruminococcaceae</i><br><i>UCG-005</i>                                     | <b><i>Bacteroides</i></b>                                    | <i>Christensenellaceae</i><br><i>R-7 group</i>          |
|            | 11.7%                                                  | 8.1%                                                    | 6.1%                                                                         | 6.1%                                                         | 5.6%                                                    |
| CR         | <i>Ruminococcaceae</i><br><i>UCG-005</i>               | <i>Christensenellaceae</i><br><i>R-7 group</i>          | <i>Ruminococcaceae</i><br><i>UCG-014</i>                                     | <i>Eubacterium</i><br><i>coprostanoligenes</i><br>group      | <i>Ruminococcaceae</i><br><i>UCG-013</i>                |
|            | 11.5%                                                  | 9.7%                                                    | 8.8%                                                                         | 6.2%                                                         | 5.1%                                                    |
| SM         | <i>Ruminococcaceae</i><br><i>UCG-010</i>               | <i>Ruminococcaceae</i><br><i>UCG-005</i>                | <i>Alistipes</i>                                                             | <i>Eubacterium</i><br><i>coprostanoligenes</i><br>group      | <i>Ruminococcaceae</i><br><i>UCG-013</i>                |
|            | 21.3%                                                  | 9.5%                                                    | 8.8%                                                                         | 5.8%                                                         | 4.4%                                                    |
| YB         | <i>Ruminococcaceae</i><br><i>UCG-010</i>               | <i>Ruminococcaceae</i><br><i>UCG-005</i>                | <i>Eubacterium</i><br><i>coprostanoligenes</i><br>group                      | <i>Ruminococcaceae</i><br><i>UCG-013</i>                     | <i>Alistipes</i>                                        |
|            | 21.0%                                                  | 10.4%                                                   | 8.0%                                                                         | 7.2%                                                         | 4.8%                                                    |
| Month      |                                                        |                                                         |                                                                              |                                                              |                                                         |
| June       | <i>Christensenellaceae</i><br><i>R-7 group</i>         | <i>Ruminococcaceae</i><br><i>UCG-014</i>                | <i>Ruminococcaceae</i><br><i>UCG-005</i>                                     | <b><i>Ruminococcaceae</i></b><br><b><i>UCG-013</i></b>       | <i>Bacteroides</i>                                      |
|            | 10%                                                    | 10%                                                     | 10%                                                                          | 6%                                                           | 6%                                                      |
| July       | <i>Christensenellaceae</i><br><i>R-7 group</i>         | <i>Ruminococcaceae</i><br><i>UCG-005</i>                | <i>Ruminococcaceae</i><br><i>UCG-014</i>                                     | <b><i>Ruminococcaceae</i></b><br><b><i>NK4A214 group</i></b> | <b><i>Eubacterium</i></b><br><b><i>brachy group</i></b> |
|            | 13%                                                    | 12%                                                     | 9%                                                                           | 6%                                                           | 5%                                                      |
| August     | <i>Ruminococcaceae</i><br><i>UCG-014</i>               | <i>Ruminococcaceae</i><br><i>UCG-005</i>                | <b><i>Eubacterium</i></b><br><b><i>coprostanoligenes</i></b><br><b>group</b> | <b><i>Candidatus</i></b><br><b><i>Saccharimonas</i></b>      | <i>Bacteroides</i>                                      |
|            | 11%                                                    | 11%                                                     | 10%                                                                          | 7%                                                           | 6%                                                      |

Table 3. Results of 4-way, 2-way, and 3-way PERMANOVA comparisons of Bray Curtis dissimilarity matrix for all four mountain goat populations, for captive and wild mountain goats, and for the different collection months at Caw Ridge, Alberta, respectively.

| Group      | #perm | DF (factor:total) | SS    | MS    | F.model | p-value | R <sup>2</sup> |
|------------|-------|-------------------|-------|-------|---------|---------|----------------|
| Status     | 999   | 1:41              | 0.670 | 0.670 | 1.395   | 0.001   | 0.034          |
| Population | 999   | 3:41              | 1.801 | 0.600 | 1.263   | 0.001   | 0.091          |
| Month      | 999   | 2:14              | 0.996 | 0.498 | 1.063   | 0.018   | 0.151          |
